# Supplementary material for: Resveratrol attenuates TLR-4 mediated inflammation and elicits therapeutic potential in models of sepsis
Source: PubMed Central journal article supplement (PMC7608666; doi:10.1038/s41598-020-74578-9), 2020-11-02
Supplement: 41598_2020_74578_MOESM1_ESM.pdf [file 41598_2020_74578_MOESM1_ESM.pdf]

# **Resveratrol attenuates TLR-4 mediated inflammation and elicits therapeutic potential in models of sepsis**

Binbin Wang<sup>1,2,\*</sup>, Gregory Lucien Bellot<sup>1,3,\*</sup>, Kartini Iskandar<sup>1</sup>, Tsung Wen Chong<sup>4</sup>, Fera Yiqian Goh<sup>4</sup>, June Jingyi Tai<sup>5</sup>, Herbert Schwarz<sup>1</sup>, Siew Cheng Wong<sup>5,6,#</sup>, and Shazib Pervaiz<sup>1,2,7,8,#</sup>

<sup>1</sup>Department of Physiology, National University of Singapore, Singapore. <sup>2</sup>NUS Graduate School for Integrative Sciences and Engineering, National University of Singapore. <sup>3</sup>Department of Hand & Reconstructive Microsurgery, University Orthopedic, Hand & Reconstructive Microsurgery Cluster, National University Health System, Singapore. <sup>4</sup>Department of Urology, Singapore General Hospital (SGH). <sup>5</sup>Singapore Immunology Network (SIgN), Agency for Science, Technology and Research (ASTAR), Singapore. <sup>6</sup>Department of Biochemistry, National University of Singapore, Singapore. <sup>7</sup>National University Cancer Institute, National University Health System, Singapore, Singapore. <sup>8</sup>Faculte de Medicine, University of Paris, Paris, France.

\*Contributed equally to this work

#Correspondence: Shazib Pervaiz, Department of Physiology, Yong Loo Lin School of Medicine, National University of Singapore, Singapore 117597. E-mail: [phssp@nus.edu.sg](mailto:phssp@nus.edu.sg) or Siew Cheng Wong, Singapore Immunology Network (SIgN), Agency for Science, Technology and Research, Singapore 138648. E-mail: [wong\\_siew\\_cheng@immunol.a-star.edu.sg](mailto:wong_siew_cheng@immunol.a-star.edu.sg).

**Running title: Resveratrol mitigates inflammation in sepsis**

**Keywords: Sepsis, Resveratrol, signaling, autophagy, monocytes**

### Supplementary Figure 1

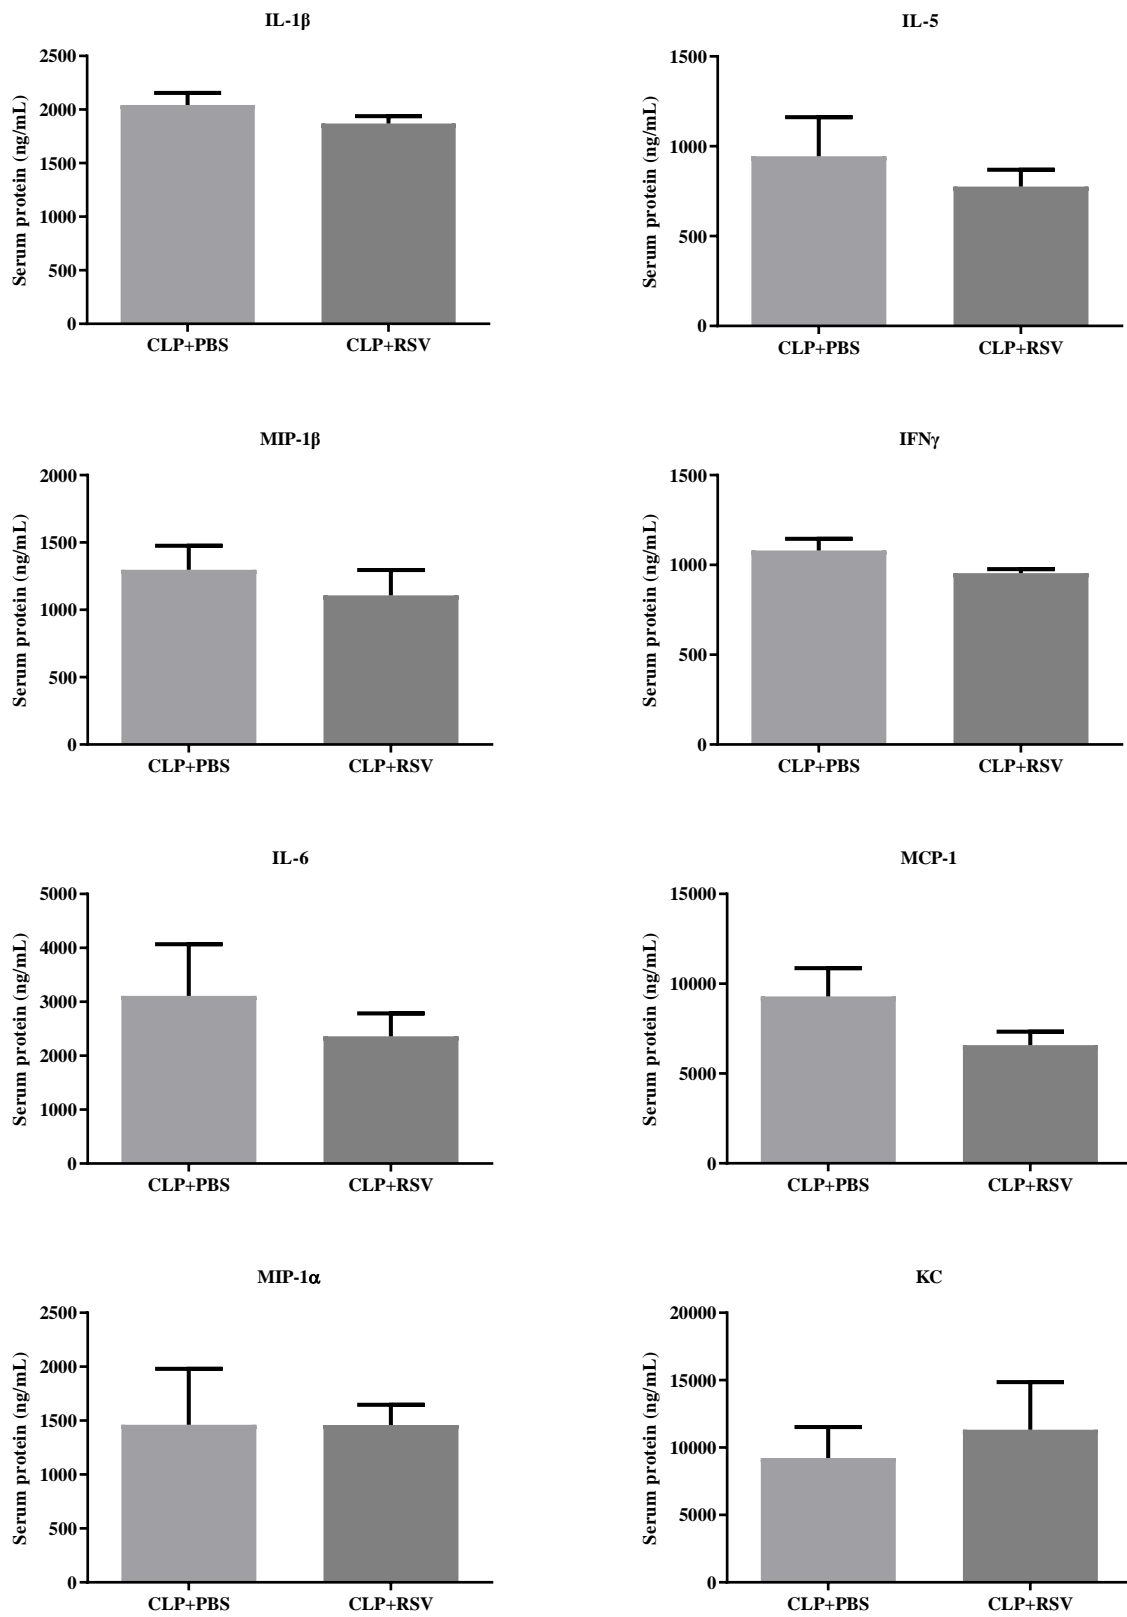

**Supplementary Figure 2**

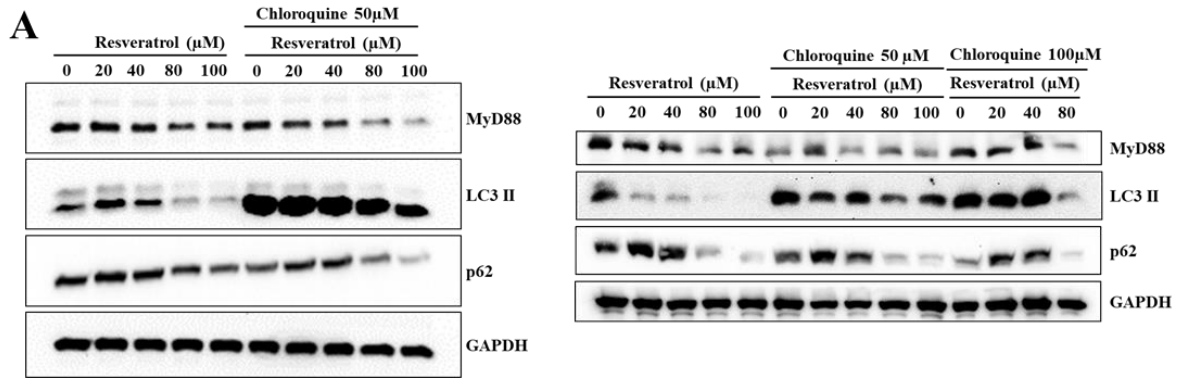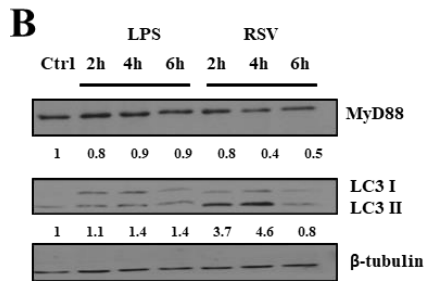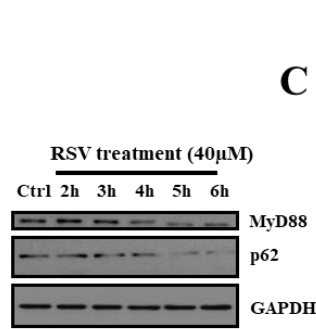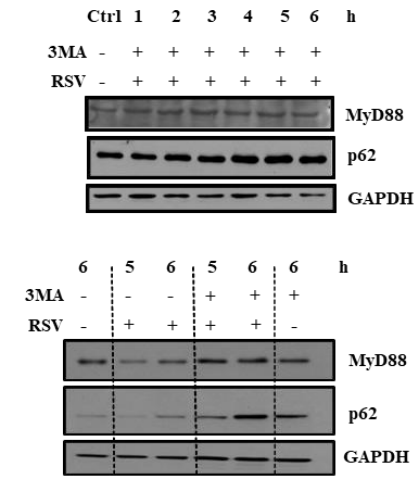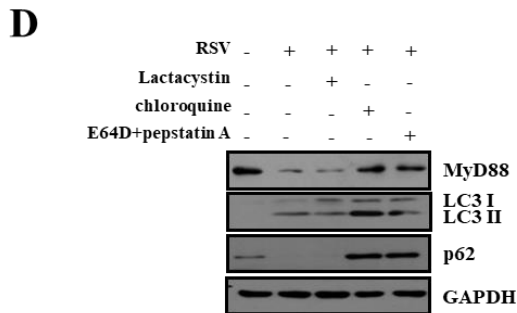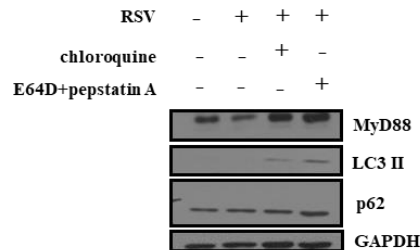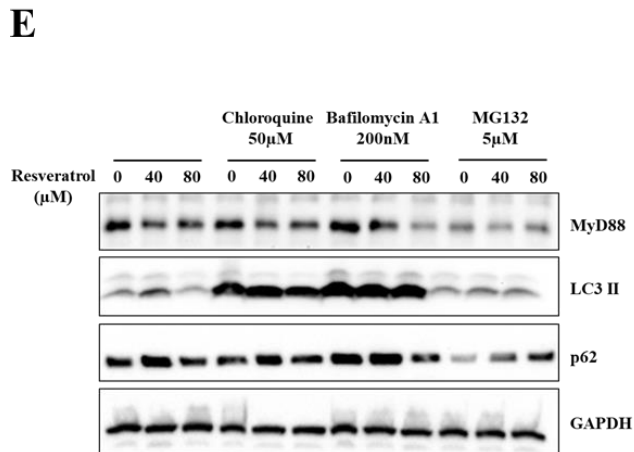

## Supplementary Figures Legends

**Supplementary figure 1:** Levels of L-1 $\beta$ , IL-5, IL-6, MCP-1, IFN $\gamma$ , MIP-1 $\alpha$ , MIP-1 $\beta$  and CXCL1(KC) in serum of mice treated as in figure 4A, were measured 24h after CLP by ELISA. Statistical analysis did not reveal any significant variation between PBS and RSV-treated groups in these conditions. Data were derived from Dr. Wang Binbin PhD Thesis.

**Supplementary figure 2:** **A)** U937 cells were treated with increasing concentrations of resveratrol ranging from 0 to 100 $\mu$ M for 6h with or without pre-incubation of chloroquine 50 $\mu$ M or 100 $\mu$ M for 1h. Western blot analysis of p62, MyD88, LC3 was performed using GAPDH as loading control. **B)** Human primary monocytes were treated with 40 $\mu$ M RSV for the indicated time points (2-6h). Western blot analysis of MyD88, LC3 and p62 was performed using  $\beta$ -tubulin as loading control. **C)** Immunoblot analysis of expression of MyD88, LC3 and p62 in U-937 cells (upper panel) or human primary monocytes (lower panel) treated with 40 $\mu$ M RSV for 0, 2, 3, 4, 5 and 6h pre-incubated with 5mM 3MA for 1h and then treated. GAPDH was used as loading control. **D)** Immunoblot analysis of expression of p62, MyD88 and LC3 in human monocytic U-937 cells (left panel) or human primary monocytes (right panel) treated with 40 $\mu$ M RSV for 6h with pre-incubation of either 50 $\mu$ M chloroquine, 10 $\mu$ g/ml E64D+10 $\mu$ g/ml pepstatin A or 10 $\mu$ M lactacystin. GAPDH was used as loading control. **E)** U937 cells were treated with 0, 40 or 80 $\mu$ M of resveratrol for 6h alone or in presence of 80 $\mu$ M chloroquine, 200nM bafilomycin A1 or 5 $\mu$ M MG132. Western blot analysis of p62, MyD88, LC3 was performed using GAPDH as loading control. Data shown in B, C and D were derived from Dr. Wang Binbin PhD Thesis.
